# Supplementary material for: A nutrient-wide association study for the risk of cardiovascular disease in the China Health and Nutrition Survey (CHNS) and the National Health and Nutrition Examination Survey (NHANES)
Source: Royal Society of Chemistry journal article supplement (doi:10.1039/d3fo01758c), 2023-01-01
Supplement: d3fo01758c4.pdf [file d3fo01758c4.pdf]

**Supplementary Table 1.** Average daily dietary intake of 29 nutrients in CHNS and 4 nutrients in NHANES

| Dietary Variable                   | CHNS<br>N=7878 | NHANES<br>N=3598 |
|------------------------------------|----------------|------------------|
| FDR-significant associations       |                |                  |
| Selenium, µg/day                   | 46.9(0.44)     | 126.74(1.03)     |
| Vitamin A, µg RAE/day              | 320.21(4.30)   | 631.08(8.97)     |
| Carotenoids, µg/day                | 1995.46(12.58) | 2584.47(60.75)   |
| Total Protein, g/day               | 67.76(0.15)    | 81.21(0.55)      |
| Non-FDR-significant associations   |                |                  |
| Retinol, µg/day                    | 153.96(4.91)   | -                |
| Thiamine, mg/day                   | 1.08(0.01)     | -                |
| Riboflavin, mg/day                 | 0.85(0.01)     | -                |
| Nicotinic acid, mg/day             | 16.17(0.1)     | -                |
| Vitamin E, mg/day                  | 34.21(0.36)    | -                |
| Calcium, mg/day                    | 438.72(2.96)   | -                |
| Phosphorus, mg/day                 | 1088.16(4.76)  | -                |
| Potassium, mg/day                  | 1827.06(9)     | -                |
| Sodium, mg/day                     | 6173.71(36.88) | -                |
| Magnesium, mg/day                  | 335.77(1.46)   | -                |
| Iron, mg/day                       | 24.11(0.16)    | -                |
| Zinc, mg/day                       | 12.18(0.06)    | -                |
| Copper, mg/day                     | 2.19(0.01)     | -                |
| Manganese, mg/day                  | 335.77(2.15)   | -                |
| Fatty acids, g/day                 | 50.58(0.45)    | -                |
| Saturated fatty acids, g/day       | 10.83(0.1)     | -                |
| Monounsaturated fatty acids, g/day | 20.81(0.19)    | -                |
| Polyunsaturated fatty acids, g/day | 18.17(0.21)    | -                |
| Vitamin C, mg/day                  | 99.71(0.79)    | -                |
| Cholesterol, mg/day                | 292.58(4.02)   | -                |
| Carbohydrates, g/day               | 321.77(1.23)   | -                |
| Fat, g/day                         | 69.63(0.43)    | -                |
| Dietary fiber, g/day               | 12.35(0.1)     | -                |
| Plant Protein, g/day               | 44.32(0.10)    | 27.94(0.40)      |
| Animal Protein, g/day              | 23.44(0.10)    | 53.27(0.45)      |

\*All values are means ± SEs.

**Supplementary Table 2.** HRs and 95% CIs for the third tertile compared to the first tertile of 29 nutrients intakes in relation to cardiovascular disease risk in the CHNS Study

| Dietary Variable                 | P Value* | HR(95%CI)       | adjust-P Value |
|----------------------------------|----------|-----------------|----------------|
| FDR-significant associations     |          |                 |                |
| Selenium                         | 0.007    | 0.68(0.51-0.90) | 0.049          |
| Vitamin A                        | 0.007    | 0.70(0.54-0.91) | 0.049          |
| Carotenoids                      | 0.001    | 0.64(0.50-0.83) | 0.009          |
| Total Protein                    | 0.001    | 0.54(0.38-0.77) | 0.009          |
| Non-FDR-significant associations |          |                 |                |
| Retinol                          | 0.349    | 1.13(0.88-1.46) | 0.514          |
| Thiamine                         | 0.269    | 1.18(0.88-1.57) | 0.488          |
| Riboflavin                       | 0.029    | 0.72(0.54-0.97) | 0.120          |
| Nicotinic acid                   | 0.194    | 0.82(0.61-1.10) | 0.453          |
| Vitamin E                        | 0.017    | 1.35(1.06-1.73) | 0.096          |
| Calcium                          | 0.080    | 0.79(0.60-1.03) | 0.257          |
| Phosphorus                       | 0.104    | 0.76(0.55-1.06) | 0.300          |
| Potassium                        | 0.715    | 0.95(0.71-1.27) | 0.797          |
| Sodium                           | 0.234    | 1.16(0.91-1.48) | 0.453          |
| Magnesium                        | 0.774    | 1.04(0.78-1.40) | 0.797          |
| Iron                             | 0.345    | 0.87(0.65-1.17) | 0.514          |
| Zinc                             | 0.204    | 0.81(0.58-1.12) | 0.453          |
| Copper                           | 0.441    | 0.89(0.65-1.21) | 0.609          |
| Manganese                        | 0.797    | 0.96(0.70-1.32) | 0.797          |
| Fatty acids                      | 0.531    | 0.92(0.72-1.19) | 0.699          |
| Saturated fatty acids            | 0.147    | 0.84(0.65-1.07) | 0.389          |
| Monounsaturated fatty acids      | 0.049    | 0.78(0.60-1.00) | 0.178          |
| Polyunsaturated fatty acids      | 0.354    | 1.12(0.88-1.44) | 0.514          |
| Vitamin C                        | 0.558    | 0.93(0.73-1.19) | 0.703          |
| Cholesterol                      | 0.340    | 0.88(0.68-1.14) | 0.514          |
| Carbohydrates                    | 0.770    | 0.95(0.66-1.36) | 0.797          |
| Fat                              | 0.642    | 1.07(0.80-1.45) | 0.744          |
| Dietary fiber                    | 0.224    | 1.17(0.91-1.52) | 0.453          |
| Plant Protein                    | 0.604    | 0.92(0.68-1.26) | 0.729          |
| Animal Protein                   | 0.023    | 0.73(0.56-0.96) | 0.110          |

\*Adjusted for sex, age, BMI, place of residence, education level, alcohol consumption, history of smoking, energy intake, PA, and history of hypertension

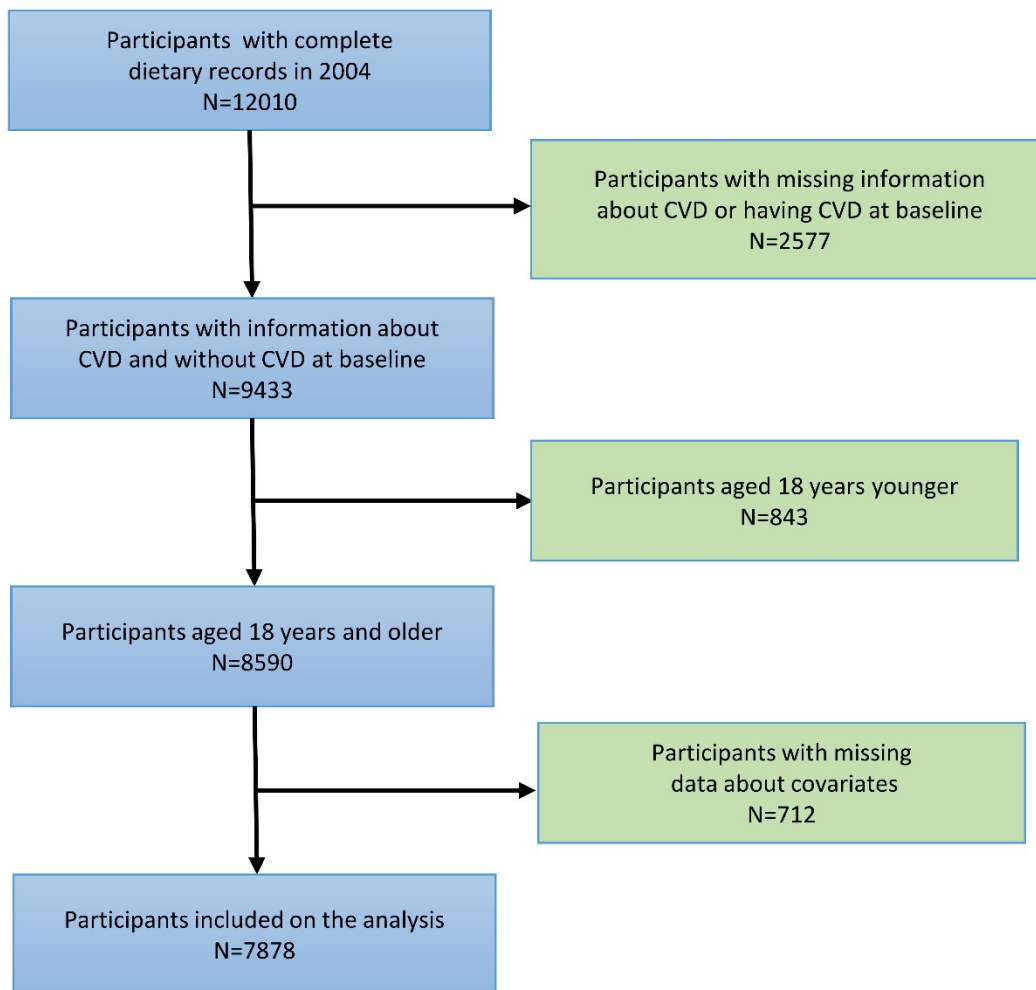

**Supplementary Figure 1.** Flow chart of the China Health and Nutrition Survey

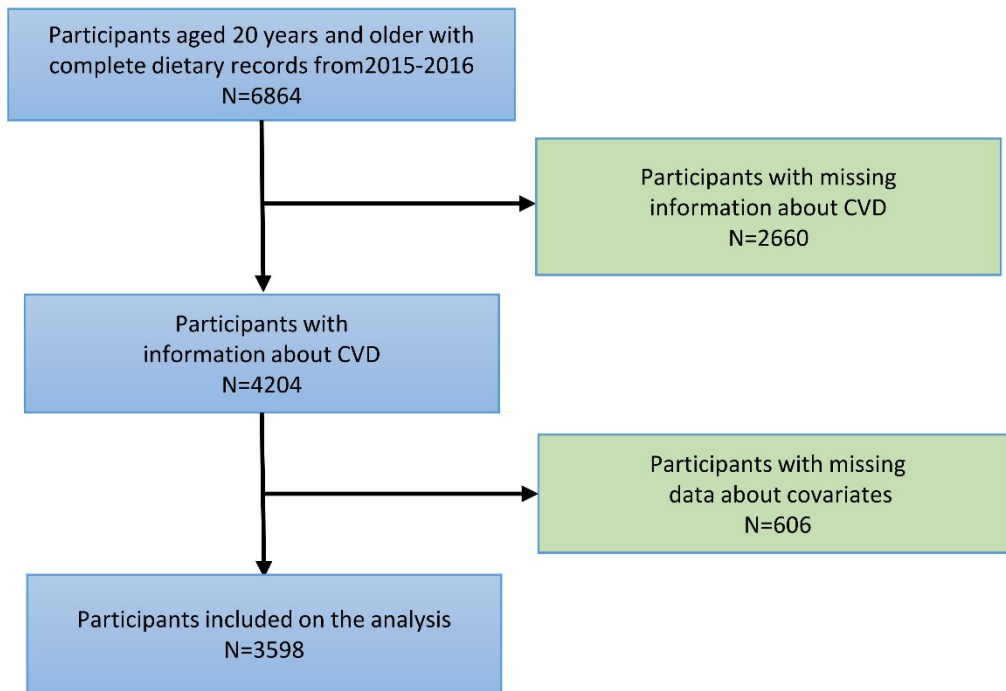

**Supplementary Figure 2.** Flow chart of the National Health and Nutrition Examination Survey
