# Supplementary figures and images for: A nutrient-wide association study for the risk of cardiovascular disease in the China Health and Nutrition Survey (CHNS) and the National Health and Nutrition Examination Survey (NHANES)
Source: Royal Society of Chemistry journal article supplement (doi:10.1039/d3fo01758c), 2023-01-01

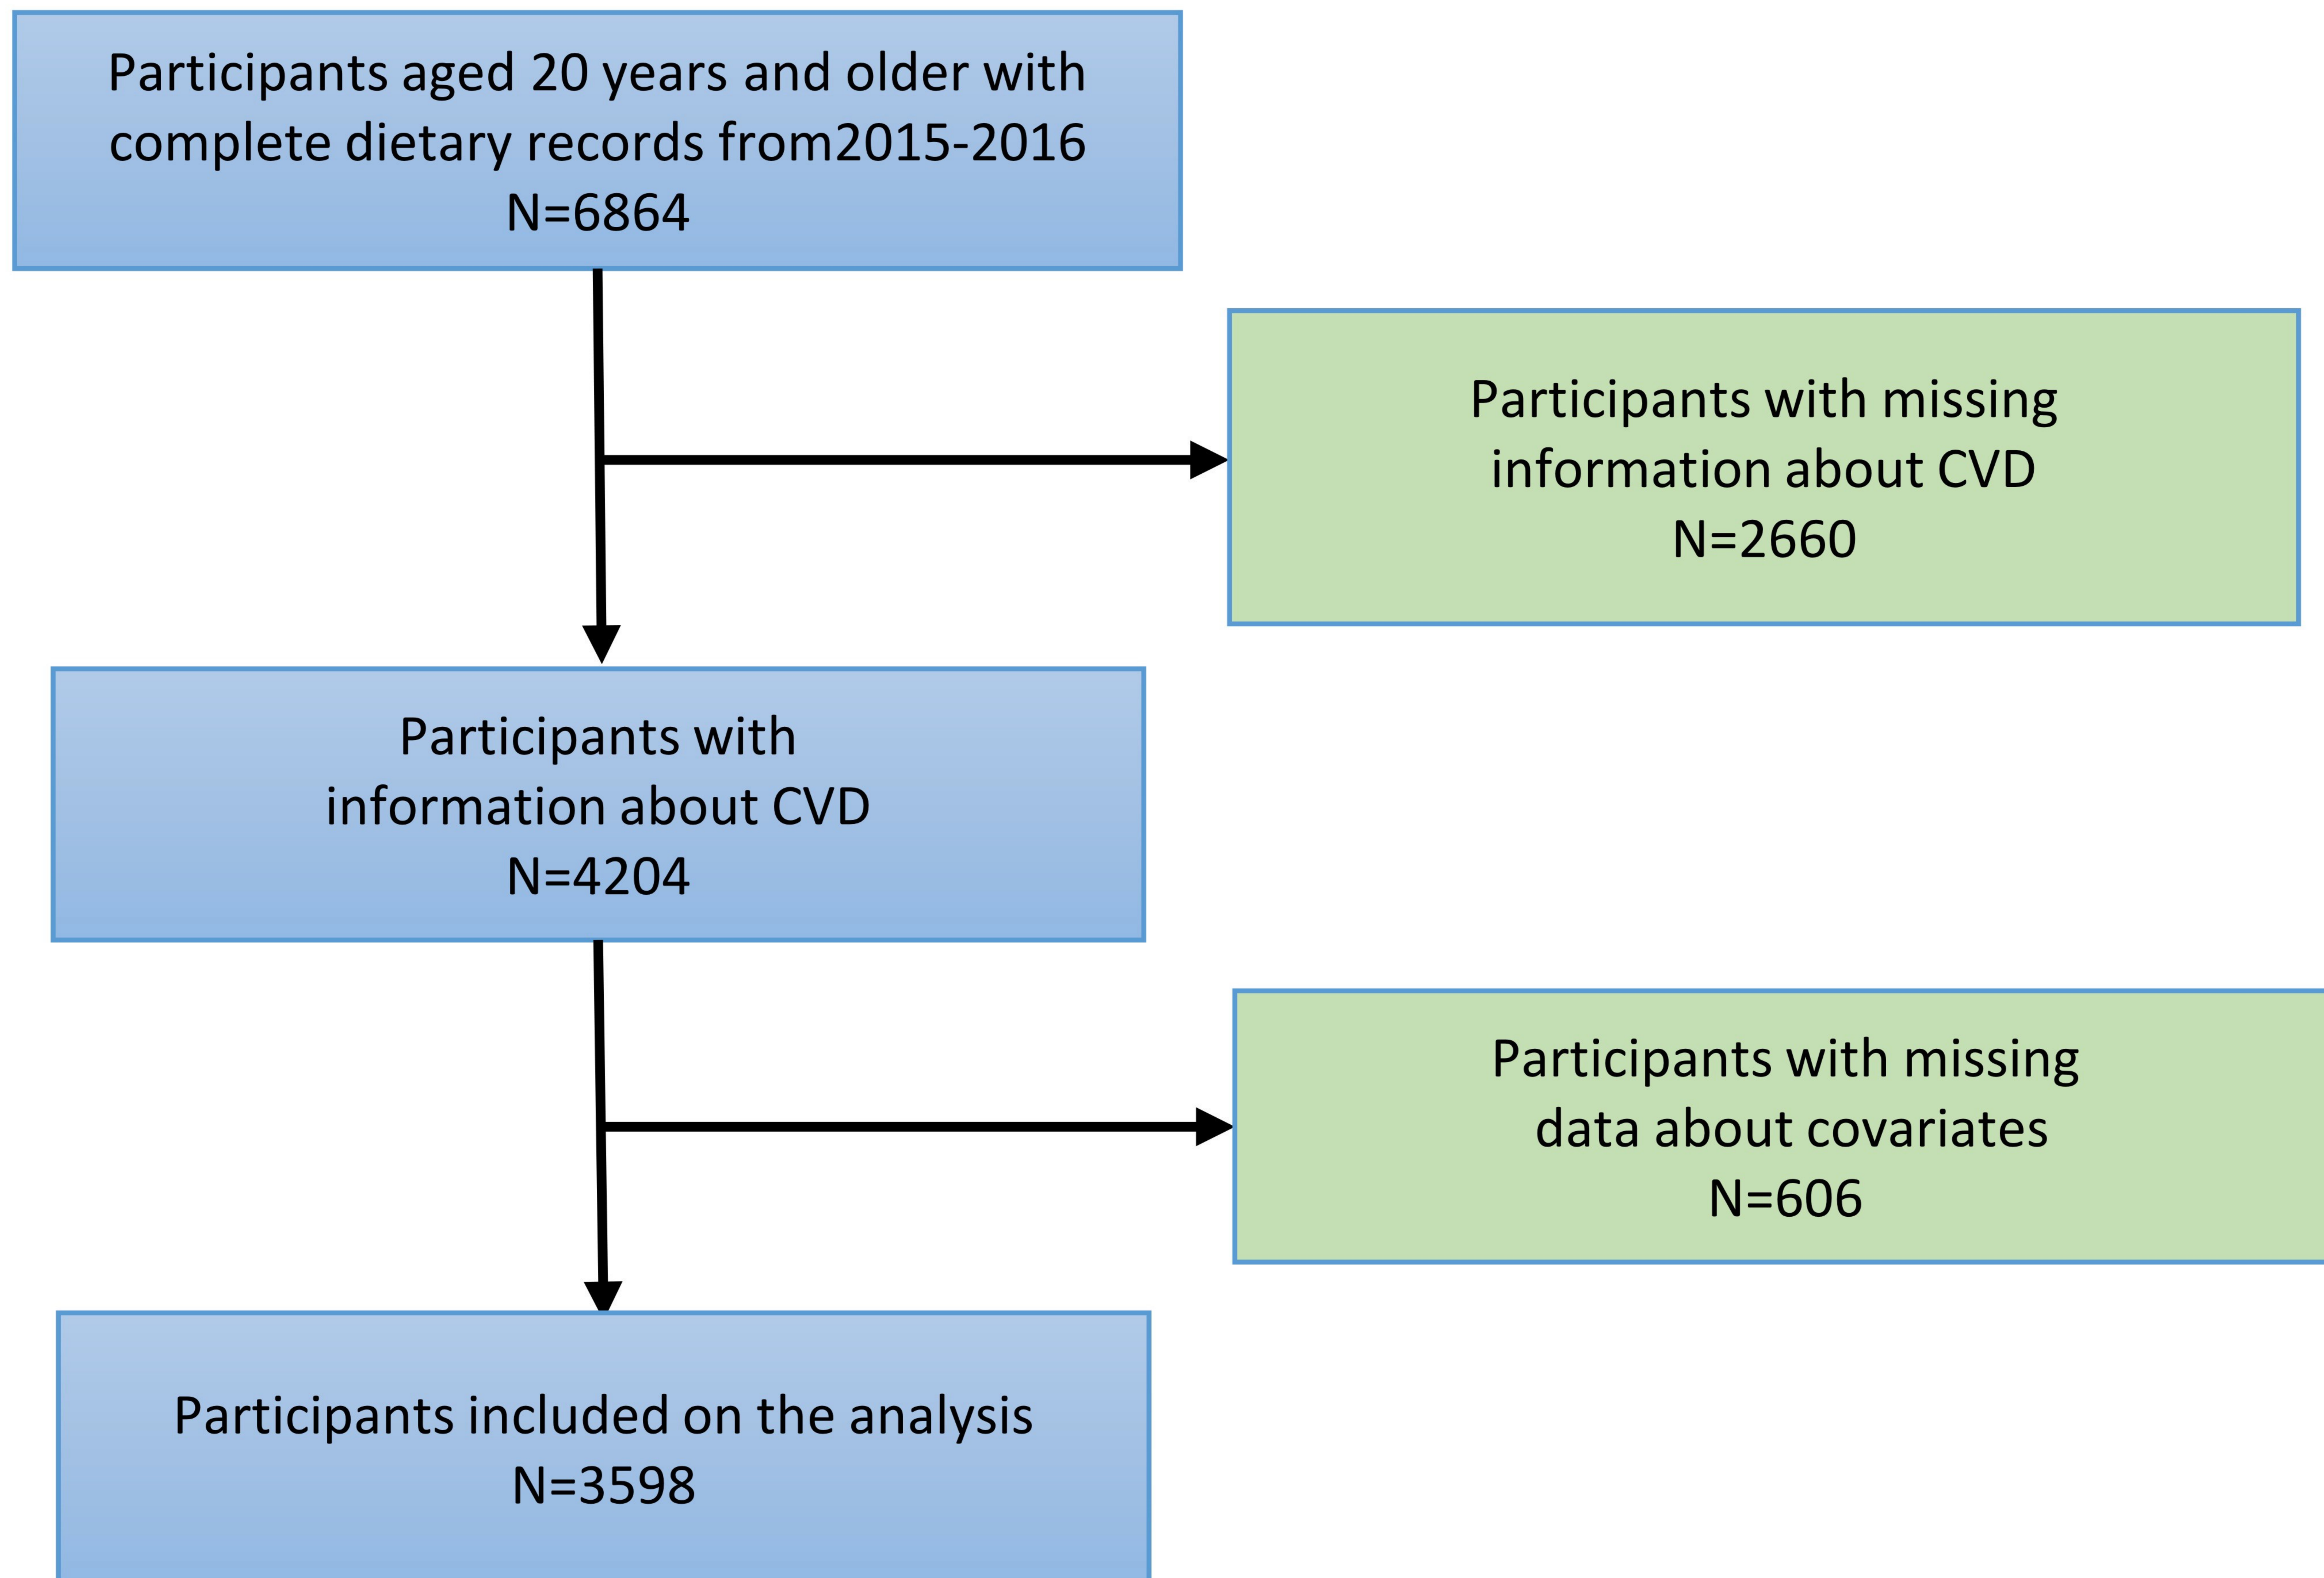

Supplement: d3fo01758c3.pdf [file d3fo01758c3.pdf]
